# Supplementary material
Source: PubMed Central journal article supplement (PMC5304465)

Figure e-1. Data collected from 2,026 individuals for analysis after applying the exclusionary criteria

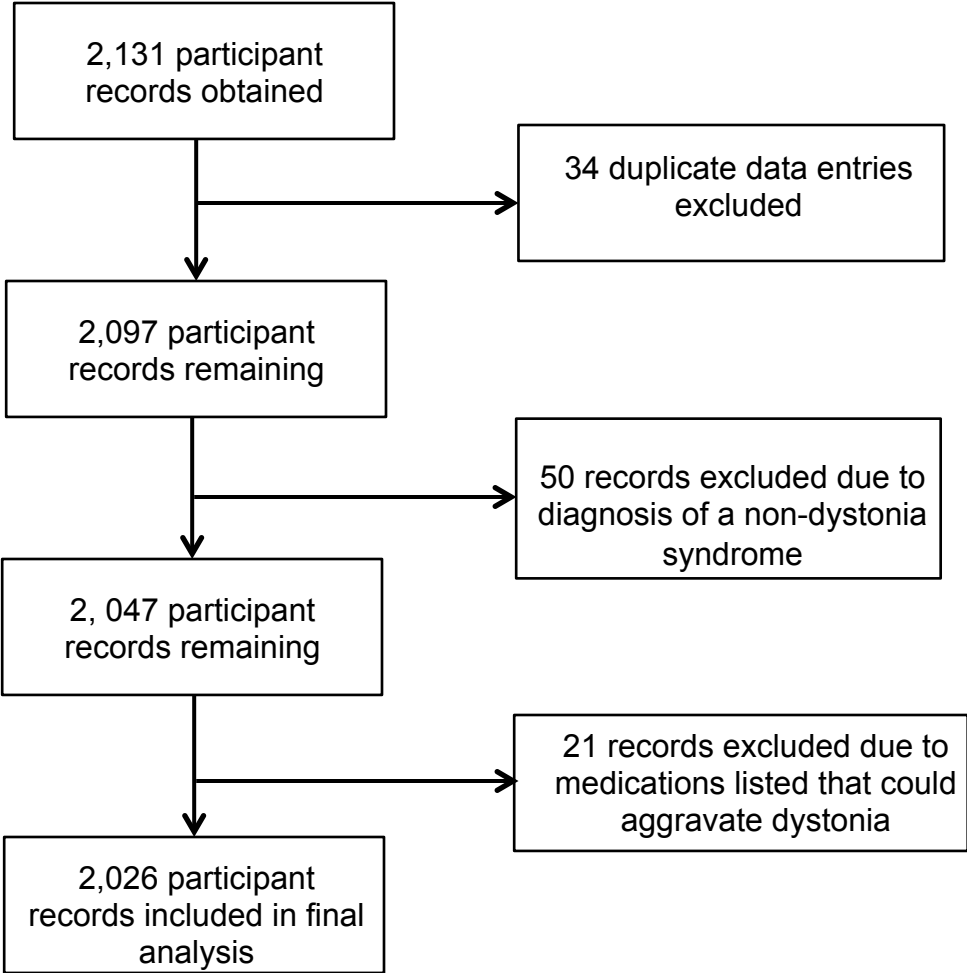

Supplement: supp_WNL.0000000000003596_Figure_e-1.pdf [file supp_WNL.0000000000003596_Figure_e-1.pdf]
