# Supplementary material
Source: PubMed Central journal article supplement (PMC5304465)
Supplement: supp_WNL.0000000000003596_Table_e-2.pdf [file supp_WNL.0000000000003596_Table_e-2.pdf]

**Table e-2. DBS Patients**

|                                  |                |               |          |
|----------------------------------|----------------|---------------|----------|
| Dystonia type                    | Focal          | 13 (26.5%)    |          |
|                                  |                | Cervical      | 12 (92%) |
|                                  |                | Lower cranial | 1 (8%)   |
|                                  | Generalized    | 25 (51.0%)    |          |
|                                  | Multifocal     | 4 (8.2%)      |          |
| Segmental                        | 7 (14.3%)      |               |          |
| Age of onset<br>(in years)       | 0-35           | 27 (53%)      |          |
|                                  | 36-46          | 9 (17.7%)     |          |
|                                  | 47-56          | 7 (13.7%)     |          |
|                                  | 57-82          | 8 (15.7%)     |          |
| Disease duration<br>(in years)   | 0-4            | 6 (14.3%)     |          |
|                                  | 5-10           | 4 (9.5%)      |          |
|                                  | 11-19          | 9 (21.4%)     |          |
|                                  | 20-74          | 23 (54.8%)    |          |
| Disease severity<br>(GDRS total) | 0-3            | 3 (5.9%)      |          |
|                                  | 4-6            | 3 (5.9%)      |          |
|                                  | 7-9            | 7 (13.7%)     |          |
|                                  | 10-102         | 38 (74.5%)    |          |
| Medication Use                   | None           | 7 (13.7%)     |          |
|                                  | Oral           | 16 (31.4%)    |          |
|                                  | BoNT           | 9 (17.7%)     |          |
|                                  | BoNT plus oral | 19 (37.3%)    |          |
