# Supplementary material
Source: PubMed Central journal article supplement (PMC5304465)
Supplement: supp_WNL.0000000000003596_Table_e_1.pdf [file supp_WNL.0000000000003596_Table_e_1.pdf]

**Table e-1** This regional difference in medication use (i.e. taking a dystonia medication vs. not taking dystonia medications) persisted when adjusted for dystonia type, presence of anxiety/depression, disease severity and duration (p<0.0001)

| REGION                 | FOCAL DYSTONIA   | GENERALIZED  | HEMIDYSTONIA | MULTIFOCAL   | SEGMENTAL      |
|------------------------|------------------|--------------|--------------|--------------|----------------|
| NORTHEAST              | 103<br>(73.1%)   | 11<br>(8.0%) | 1<br>(0.7%)  | 4<br>(2.8%)  | 22<br>(16.0%)  |
| REST OF SITES COMBINED | 1,425<br>(77.0%) | 65<br>(4.0%) | 7<br>(0.4%)  | 57<br>(3.1%) | 306<br>(17.0%) |
